# Supplementary material
Source: PubMed Central journal article supplement (PMC7236889)
Supplement: NIHMS1541052-supplement-1.pdf [file NIHMS1541052-supplement-1.pdf]

|       |         | human   |          |          | rat     |          |          |
|-------|---------|---------|----------|----------|---------|----------|----------|
|       |         | $\beta$ | $\alpha$ | $\delta$ | $\beta$ | $\alpha$ | $\delta$ |
| GAD65 | IF      | +       | +        | +        | +       | -        | -        |
|       | RNA seq | +       | +        | +        | nd      | nd       | nd       |
| VGAT  | IF      | -       | -        | +        | -       | +        | -        |
|       | RNA seq | -       | -        | -        | nd      | nd       | nd       |
| GABA  | IF      | +       | -        | +        | +       | -        | -        |

|    |              |
|----|--------------|
| +  | positive     |
| -  | not detected |
| nd | no data      |

**Supplementary Table 1. Data summary comparing the expression of GAD65, VGAT, and GABA in human and rat islet endocrine cell subtypes.** Table summarizes results obtained by immunofluorescence (our results) and the public single cell RNA-seq datasets analyzed in this paper. While VGAT was not detected by RNA-seq, it was detected by immunostaining, likely because its mRNA transcripts were below the detection threshold. VGAT mRNA has been detected by others in whole human islets by rt-PCR.
